# Supplementary material
Source: Research Square preprint supplement (doi:10.21203/rs.3.rs-9371933/v1)
Supplement: Supplementary file 1 [file 8851a0a8bfe2d860ca067244.pdf]

## Supplemental Information

### Coral mortality in a mass bleaching event influenced by proximity to diseased tissue and reef topography

**Journal:** *Coral Reefs*

**Authors:** Camilla L. Nivison<sup>1\*</sup>, Christa R. May<sup>1</sup>, Mari Ella Bourbonnais<sup>2</sup>, Shannon Shotz<sup>1</sup>, Isabelle Basden<sup>3</sup>, Deyan Deng<sup>4</sup>, Shannon Dixon<sup>3</sup>, Debao Huang<sup>4,5</sup>, Ann Marie Hulver<sup>3</sup>, Mariam Ayad<sup>6</sup>, Erin K. Lipp<sup>7</sup>, Rongjun Qin<sup>4,5</sup>, Andréa G. Grottoli<sup>3</sup>, James W. Porter<sup>1</sup>

<sup>1</sup>Odum School of Ecology, University of Georgia, Athens, GA, USA

<sup>2</sup>Department of Marine Sciences, Franklin College, University of Georgia, Athens, GA, USA

<sup>3</sup>School of Earth Sciences, The Ohio State University, Columbus, OH, USA

<sup>4</sup>Department of Civil, Environmental and Geodetic Engineering, The Ohio State University, Columbus, OH, USA

<sup>5</sup>Department of Electrical and Computer Engineering, The Ohio State University, Columbus, OH, USA

<sup>6</sup>Department of Ocean Sciences, University of California Santa Cruz, Santa Cruz, CA, USA

<sup>7</sup>Department of Environmental Health Sciences, College of Public Health, University of Georgia, Athens, GA, USA

\*corresponding author's email: [camilla.nivison@uga.edu](mailto:camilla.nivison@uga.edu)

**Table S1.** Photographic sampling dates at Horseshoe Reef, Florida.

| Year | Date   | Plots   | Photographic Method            |
|------|--------|---------|--------------------------------|
| 2022 | 5-Jul  | 4       | Video (30 frames per second)   |
|      | 7-Jul  | 2       |                                |
|      | 8-Jul  | 3       |                                |
|      | 12-Jul | 1       |                                |
| 2023 | 11-Jul | 1, 4    | 1-second intervalometer photos |
|      | 13-Jul | 2, 3    |                                |
|      | 14-Jul | 1, 3, 4 |                                |
|      | 20-Jul | 4       |                                |
|      | 22-Jul | 1, 2, 3 |                                |
|      | 24-Jul | 4       |                                |
|      | 25-Jul | 1, 2, 3 |                                |

**Table S2.** Comparison of Cox mixed-effects models evaluating coral tissue survival (n = 1,606 intervals; 400 events).

| <b>Model</b>                               | <b>AIC</b>   | <b>Variable</b>               | <b>HR</b>    | <b>SE</b>    | <b>z</b>     | <b>p</b>         | <b>SD<sub>Colony</sub></b> |
|--------------------------------------------|--------------|-------------------------------|--------------|--------------|--------------|------------------|----------------------------|
| <b>Base (tissue type)</b>                  | <b>144.7</b> | Tissue:disease                | <b>3.778</b> | <b>0.138</b> | <b>9.63</b>  | <b>p ≤ 0.001</b> | 0.714                      |
|                                            |              | Tissue: neighbor              | <b>1.533</b> | <b>0.116</b> | <b>3.69</b>  | <b>p ≤ 0.001</b> |                            |
| <b>× Proportion diseased</b>               | 147.3        | Tissue:disease                | <b>4.133</b> | <b>0.251</b> | <b>5.65</b>  | <b>p ≤ 0.001</b> | 0.669                      |
|                                            |              | Tissue:neighbor               | 1.393        | 0.211        | 1.57         | NS               |                            |
|                                            |              | Proportion diseased           | <b>1.066</b> | <b>0.030</b> | <b>2.12</b>  | <b>p ≤ 0.05</b>  |                            |
|                                            |              | Tissue:disease×Prop diseased  | 0.986        | 0.033        | -0.41        | NS               |                            |
|                                            |              | Tissue:neighbor×Prop diseased | 1.015        | 0.027        | 0.55         | NS               |                            |
| <b>+ Proportion diseased</b>               | 150.5        | Tissue:disease                | <b>3.796</b> | <b>0.138</b> | <b>9.67</b>  | <b>p ≤ 0.001</b> | 0.667                      |
|                                            |              | Tissue:neighbor               | <b>1.535</b> | <b>0.116</b> | <b>3.71</b>  | <b>p ≤ 0.001</b> |                            |
|                                            |              | Proportion diseased           | <b>1.069</b> | <b>0.025</b> | <b>2.69</b>  | <b>p ≤ 0.01</b>  |                            |
| <b>+ Lesion size + proportion diseased</b> | 152.8        | Tissue:disease                | <b>3.782</b> | <b>0.138</b> | <b>9.64</b>  | <b>p ≤ 0.001</b> | 0.611                      |
|                                            |              | Tissue:neighbor               | <b>1.532</b> | <b>0.116</b> | <b>3.69</b>  | <b>p ≤ 0.001</b> |                            |
|                                            |              | Lesion size                   | <b>1.034</b> | <b>0.016</b> | <b>2.09</b>  | <b>p ≤ 0.05</b>  |                            |
|                                            |              | Proportion diseased           | 1.030        | 0.029        | 1.05         | NS               |                            |
| <b>+ Colony size</b>                       | 153.1        | Tissue:disease                | <b>3.794</b> | <b>0.138</b> | <b>9.66</b>  | <b>p ≤ 0.001</b> | 0.630                      |
|                                            |              | Tissue:neighbor               | <b>1.535</b> | <b>0.116</b> | <b>3.70</b>  | <b>p ≤ 0.001</b> |                            |
|                                            |              | Colony size                   | <b>1.001</b> | <b>0.000</b> | <b>3.17</b>  | <b>p ≤ 0.01</b>  |                            |
| <b>+ Lesion size</b>                       | 153.5        | Tissue:disease                | <b>3.771</b> | <b>0.138</b> | <b>9.62</b>  | <b>p ≤ 0.001</b> | 0.610                      |
|                                            |              | Tissue:neighbor               | <b>1.530</b> | <b>0.116</b> | <b>3.67</b>  | <b>p ≤ 0.001</b> |                            |
|                                            |              | Lesion size                   | <b>1.045</b> | <b>0.013</b> | <b>3.33</b>  | <b>p ≤ 0.001</b> |                            |
| <b>x Lesion size</b>                       | 153.7        | Tissue:disease                | <b>4.833</b> | <b>0.183</b> | <b>8.59</b>  | <b>p ≤ 0.001</b> | 0.614                      |
|                                            |              | Tissue:neighbor               | <b>1.664</b> | <b>0.154</b> | <b>3.30</b>  | <b>p ≤ 0.001</b> |                            |
|                                            |              | Lesion size                   | <b>1.056</b> | <b>0.015</b> | <b>3.68</b>  | <b>p ≤ 0.001</b> |                            |
|                                            |              | Tissue:disease × Lesion size  | <b>0.970</b> | <b>0.015</b> | <b>-1.97</b> | <b>p ≤ 0.05</b>  |                            |

| Model                              | AIC   | Variable                      | HR           | SE           | z            | p                | <i>SD</i> Colony |
|------------------------------------|-------|-------------------------------|--------------|--------------|--------------|------------------|------------------|
|                                    |       | Tissue:neighbor × Lesion size | 0.990        | 0.011        | -0.84        | NS               |                  |
| <b>× Colony size</b>               | 155.9 | Tissue:disease                | <b>6.982</b> | <b>0.278</b> | <b>7.00</b>  | <b>p ≤ 0.001</b> | 0.637            |
|                                    |       | Tissue:neighbor               | <b>1.747</b> | <b>0.240</b> | <b>2.32</b>  | <b>p ≤ 0.05</b>  |                  |
|                                    |       | Colony size                   | <b>1.001</b> | <b>0.000</b> | <b>3.53</b>  | <b>p ≤ 0.001</b> |                  |
|                                    |       | Tissue:disease × Colony size  | <b>0.999</b> | <b>0.000</b> | <b>-2.47</b> | <b>p ≤ 0.05</b>  |                  |
|                                    |       | Tissue:neighbor × Colony size | 1.000        | 0.000        | -0.60        | NS               |                  |
| <b>+ Colony size + lesion size</b> | 157.4 | Tissue:disease                | <b>3.785</b> | <b>0.138</b> | <b>9.65</b>  | <b>p ≤ 0.001</b> | 0.570            |
|                                    |       | Tissue:neighbor               | <b>1.532</b> | <b>0.116</b> | <b>3.69</b>  | <b>p ≤ 0.001</b> |                  |
|                                    |       | Colony size                   | <b>1.001</b> | <b>0.000</b> | <b>2.35</b>  | <b>p ≤ 0.05</b>  |                  |
|                                    |       | Lesion size                   | <b>1.034</b> | <b>0.013</b> | <b>2.53</b>  | <b>p ≤ 0.05</b>  |                  |

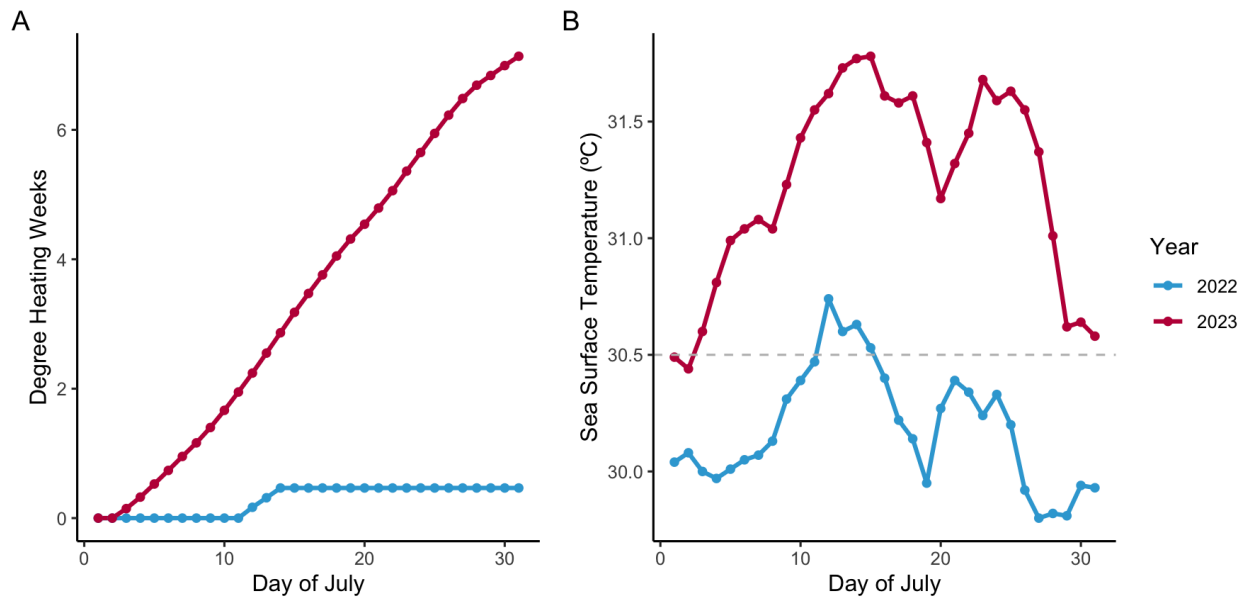

**Fig. S1** Thermal stress at Horseshoe Reef, Florida showing (A) degree heating weeks and (B) sea surface temperatures with the *Acropora palmata* bleaching threshold (horizontal dashed line) for July 2022 and 2023. Temperatures were measured by satellite by NOAA Coral Reef Watch (NOAA Coral Reef Watch 2019).

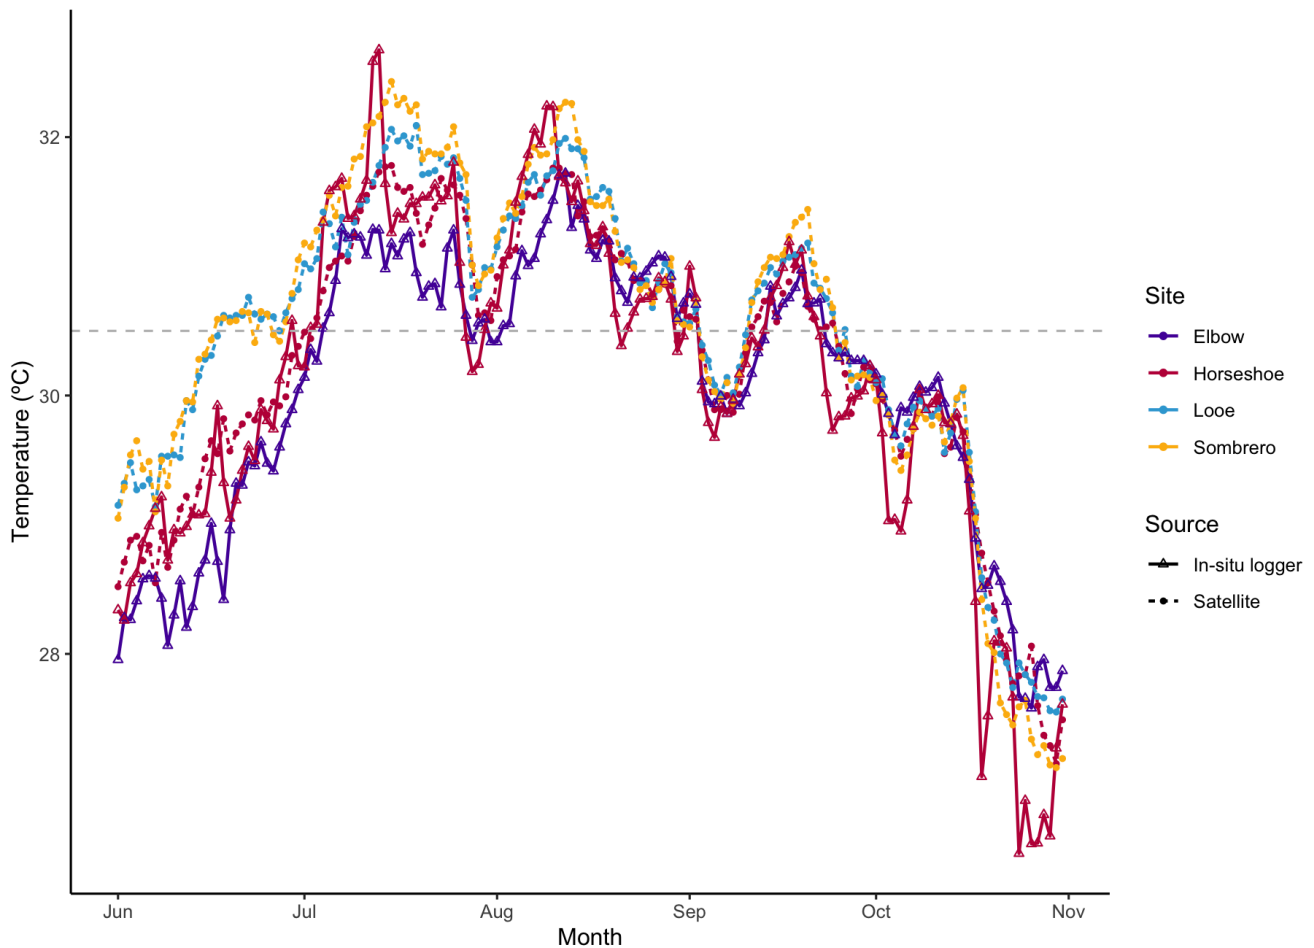

**Fig. S2** Water temperatures for the four focal reefs throughout the bleaching period. Looe Key, Sombrero Reef, and Horseshoe Reefs data were obtained from satellite virtual stations (NOAA Coral Reef Watch 2019). Data for Elbow and Horseshoe Reefs are daily medians from in-situ loggers attached to the substrate (Williams and Miller 2015). The horizontal line at 30.5°C shows the bleaching threshold for the Florida Keys (Manzello 2015).

Overall, southern reefs were hotter than northern reefs. From the satellite data, we see that temperatures on Sombrero and Looe exceeded those recorded by the same method at Horseshoe. The temperature spike recorded by the benthic temperature logger at Horseshoe indicates that temperatures experienced by the corals may be hotter than what was recorded by satellites of the surface. This spike could be due to water stagnation on this shallow patch reef. From the in-situ loggers, Elbow was generally cooler than Horseshoe, which is expected as it is farther offshore.

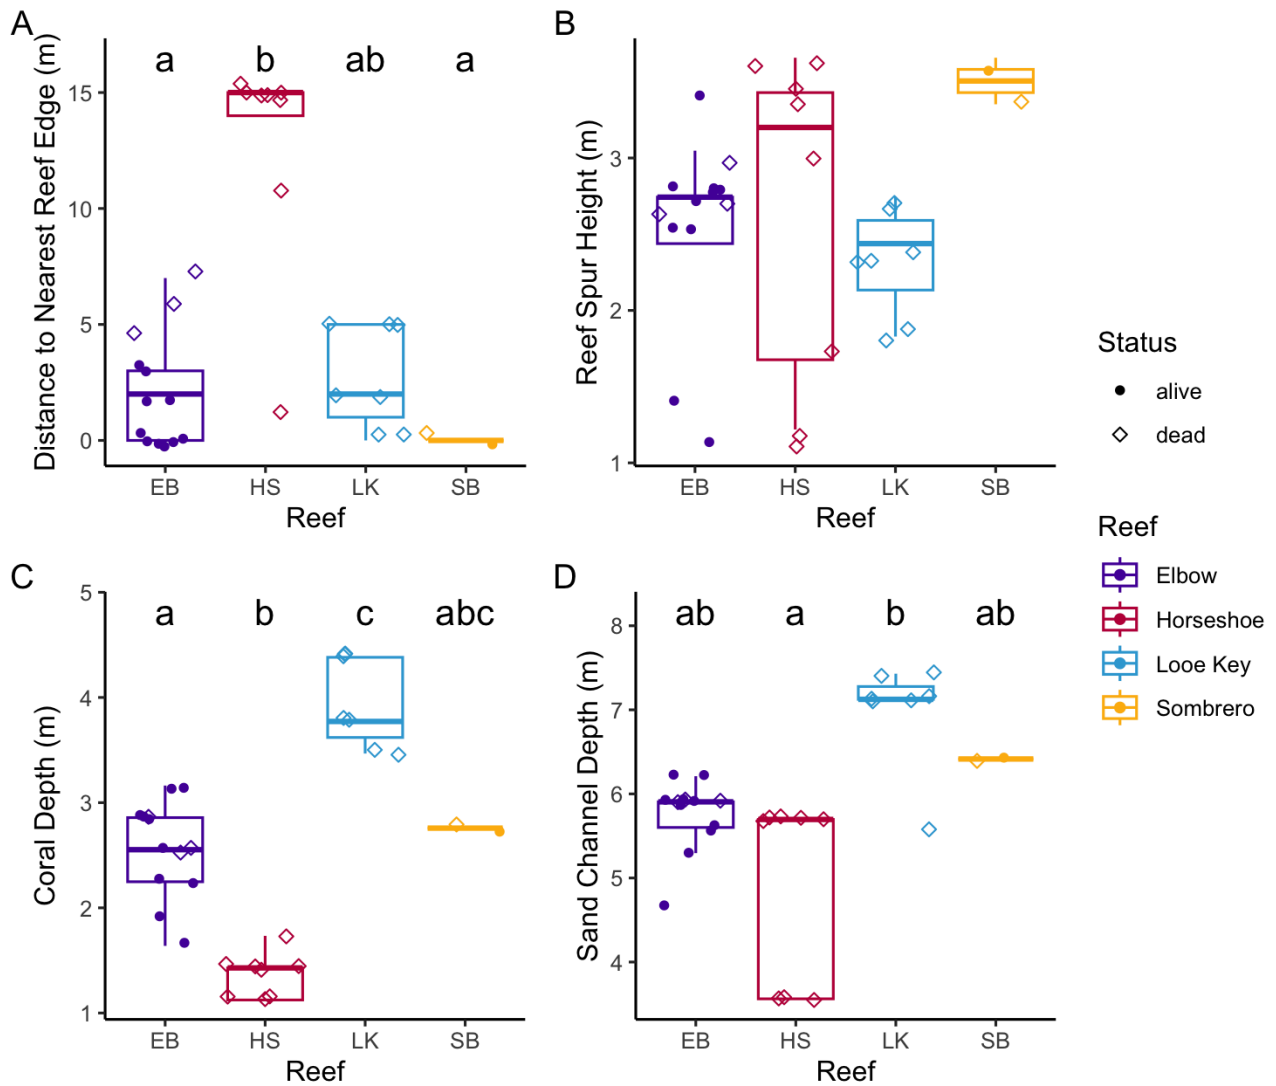

**Fig. S3** Reef structural metrics by reef. Letters indicate significant differences between sites from Kruskal Wallis with Dunn's multiple-comparison test (see Table S3 for statistics).

We found that distance to reef edge significantly differed by site ( $\chi^2(3) = 14.81$ ,  $p = 0.002$ ). Corals at Horseshoe were significantly farther from the edge than Elbow or Sombrero. Coral depth also differed by site ( $\chi^2(3) = 24.40$ ,  $p < 0.001$ ), where Elbow, Horseshoe and Looe all significantly differed from each other, but not Sombrero. Sand channel depth also differed by reef ( $\chi^2(3) = 16.10$ ,  $p = 0.001$ ). Looe was significantly deeper than Horseshoe, though neither differed from Elbow or Sombrero (**Figure S3**, **Table S3**).

**Table S3.** Results of Dunn's multiple comparison tests (with Bonferroni adjustment). Significant comparisons are in bold. Reefs are abbreviated as HS: Horseshoe, EB: Elbow, SB: Sombrero, and LK: Looe Key.

| <b>Variable</b>    | <b>Reefs</b> | <b>Z</b>     | <b>p-adjust</b>  |
|--------------------|--------------|--------------|------------------|
| Distance to edge   | <b>EB-HS</b> | <b>3.34</b>  | <b>0.005</b>     |
|                    | EB-LK        | 0.42         | 1.000            |
|                    | EB-SB        | -1.01        | 1.000            |
|                    | HS-LK        | -2.52        | 0.070            |
|                    | <b>HS-SB</b> | <b>-2.87</b> | <b>0.024</b>     |
|                    | LK-SB        | -1.20        | 1.000            |
| Reef Spur Height   | NS           | NS           | NS               |
| Coral Depth        | <b>EB-HS</b> | <b>-2.85</b> | <b>0.026</b>     |
|                    | <b>EB-LK</b> | <b>2.71</b>  | <b>0.040</b>     |
|                    | EB-SB        | 0.098        | 1.000            |
|                    | <b>HS-LK</b> | <b>4.93</b>  | <b>&lt;0.001</b> |
|                    | HS-SB        | 1.71         | 0.520            |
|                    | LK-SB        | -1.49        | 0.811            |
| Sand Channel Depth | EB-HS        | -1.69        | 0.548            |
|                    | EB-LK        | 2.53         | 0.068            |
|                    | EB-SB        | 1.40         | 0.967            |
|                    | <b>HS-LK</b> | <b>3.76</b>  | <b>0.001</b>     |
|                    | HS-SB        | 2.31         | 0.127            |
|                    | LK-SB        | -0.153       | 1.000            |
